# Supplementary material
Source: MDPI journal article supplement (https://www.mdpi.com/1424-2818/14/3/182)
Supplement: s1 [file s1]

**Supplementary Table S2.** List of specimens included in the research.

| Num-<br>ber | BOLD<br>Process ID | Barcode Index<br>Numbers (BINs) | COI<br>se-<br>quence<br>length | Specimen<br>Collec-<br>tion Date | Order     | Family        | Genus                 | Species                        |
|-------------|--------------------|---------------------------------|--------------------------------|----------------------------------|-----------|---------------|-----------------------|--------------------------------|
| 1           | MEDB001-<br>21     | BOLD:ACP8461                    | 614 bp                         | 11-May-<br>2018                  | Hemiptera | Aphrophoridae | <i>Neophilaenus</i>   | <i>Neophilaenus campestris</i> |
| 2           | MEDB002-<br>21     | BOLD:ABV4445                    | 601 bp                         | 02-Oct-<br>2018                  | Hemiptera | Cicadellidae  | <i>Psammotettix</i>   | <i>Psammotettix confinis</i>   |
| 3           | MEDB003-<br>21     | BOLD:ABX8912                    | 601 bp                         | 19-Jun-<br>2018                  | Hemiptera | Cicadellidae  | <i>Selenocephalus</i> | <i>Selenocephalus griseus</i>  |
| 4           | MEDB004-<br>21     | BOLD:AAY9491                    | 601 bp                         | 19-Apr-<br>2018                  | Hemiptera | Pentatomidae  | <i>Piezodorus</i>     | <i>Piezodorus lituratus</i>    |
| 5           | MEDB005-<br>21     | BOLD:AEB5210                    | 601 bp                         | 01-Jun-<br>2018                  | Hemiptera | Miridae       | <i>Cyphodema</i>      | <i>Cyphodema instabilis</i>    |
| 6           | MEDB006-<br>21     | BOLD:ACP8461                    | 591 bp                         | 11-May-<br>2018                  | Hemiptera | Aphrophoridae | <i>Neophilaenus</i>   | <i>Neophilaenus campestris</i> |
| 7           | MEDB007-<br>21     | BOLD:ACP8461                    | 601 bp                         | 11-May-<br>2018                  | Hemiptera | Aphrophoridae | <i>Neophilaenus</i>   | <i>Neophilaenus campestris</i> |
| 8           | MEDB008-<br>21     | BOLD:AAY8951                    | 619 bp                         | 02-Oct-<br>2018                  | Hemiptera | Pyrrhocoridae | <i>Pyrrhocoris</i>    | <i>Pyrrhocoris apterus</i>     |
| 9           | MEDB009-<br>21     | BOLD:AAY8951                    | 618 bp                         | 02-Oct-<br>2018                  | Hemiptera | Pyrrhocoridae | <i>Pyrrhocoris</i>    | <i>Pyrrhocoris apterus</i>     |
| 10          | MEDB010-<br>21     | BOLD:AAG8731                    | 591 bp                         | 20-Jun-<br>2018                  | Hemiptera | Lygaeidae     | <i>Nysius</i>         | <i>Nysius graminicola</i>      |
| 11          | MEDB011-<br>21     | BOLD:AAG8731                    | 600 bp                         | 20-Jun-<br>2018                  | Hemiptera | Lygaeidae     | <i>Nysius</i>         | <i>Nysius graminicola</i>      |
| 12          | MEDB012-<br>21     | BOLD:AAG8731                    | 620 bp                         | 12-Apr-<br>2019                  | Hemiptera | Lygaeidae     | <i>Nysius</i>         | <i>Nysius graminicola</i>      |
| 13          | MEDB013-<br>21     | BOLD:AAG8804                    | 621 bp                         | 19-Jun-<br>2018                  | Hemiptera | Cicadellidae  | <i>Psammotettix</i>   | <i>Psammotettix confinis</i>   |
| 14          | MEDB014-<br>21     | BOLD:AAV0162                    | 601 bp                         | 12-May-<br>2018                  | Hemiptera | Cicadellidae  | <i>Eutettix</i>       | <i>Eutettix variabilis</i>     |

|    |            |               |        |             |             |                  |                     |                                 |
|----|------------|---------------|--------|-------------|-------------|------------------|---------------------|---------------------------------|
| 15 | MEDB015-21 | BOLD:AAAY9515 | 618 bp | 11-Jul-2018 | Hemiptera   | Coreidae         | <i>Gonocerus</i>    | <i>Gonocerus juniperi</i>       |
| 16 | MEDB016-21 | BOLD:AAW5226  | 601 bp | 11-Jul-2018 | Hemiptera   | Cicadellidae     | <i>Aphrodes</i>     | <i>Aphrodes bicincta</i>        |
| 17 | MEDB017-21 | BOLD:ACX9740  | 601 bp | 11-Jul-2018 | Hemiptera   | Acanthosomatidae | <i>Cyphostethus</i> | <i>Cyphostethus tristriatus</i> |
| 18 | MEDB018-21 | BOLD:ADJ7303  | 658 bp | 25-Oct-2018 | Hemiptera   | Issidae          | <i>Latissus</i>     | <i>Latissus dilatatus</i>       |
| 19 | MEDB019-21 | BOLD:ADJ7303  | 621 bp | 02-Jun-2018 | Hemiptera   | Issidae          | <i>Latissus</i>     | <i>Latissus dilatatus</i>       |
| 20 | MEDB020-21 | BOLD:AAAY9515 | 601 bp | 02-Jun-2018 | Hemiptera   | Coreidae         | <i>Gonocerus</i>    | <i>Gonocerus juniperi</i>       |
| 21 | MEDB021-21 | BOLD:ADJ7303  | 621 bp | 02-Jun-2018 | Hemiptera   | Issidae          | <i>Latissus</i>     | <i>Latissus dilatatus</i>       |
| 22 | MEDB022-21 | BOLD:AEI7618  | 618 bp | 25-Oct-2018 | Hemiptera   | Pentatomidae     | <i>Nezara</i>       | <i>Nezara viridula</i>          |
| 23 | MEDB023-21 | BOLD:AAAY8957 | 625 bp | 25-Oct-2018 | Hemiptera   | Rhopalidae       | <i>Rhopalus</i>     | <i>Rhopalus parumpunctatus</i>  |
| 24 | MEDB024-21 | BOLD:AAAY8966 | 621 bp | 25-Oct-2018 | Hemiptera   | Miridae          | <i>Lygus</i>        | <i>Lygus wagneri</i>            |
| 25 | MEDB025-21 | BOLD:AAAY9083 | 621 bp | 21-Jun-2018 | Hemiptera   | Pentatomidae     | <i>Aelia</i>        | <i>Aelia acuminata</i>          |
| 26 | MEDB026-21 | BOLD:ABY1518  | 626 bp | 20-Apr-2018 | Hemiptera   | Delphacidae      | <i>Laodelphax</i>   | <i>Laodelphax striatella</i>    |
| 27 | MEDB027-21 | BOLD:ADM8532  | 658 bp | 14-Sep-2018 | Hemiptera   | Coreidae         | <i>Coreus</i>       | <i>Coreus marginatus</i>        |
| 28 | MEDB028-21 | BOLD:AAAY8971 | 658 bp | 14-Sep-2018 | Hemiptera   | Coreidae         | <i>Coreus</i>       | <i>Coreus marginatus</i>        |
| 29 | MEDB030-21 | BOLD:AAB2572  | 621 bp | 20-Apr-2018 | Hemiptera   | Aphididae        | <i>Aulacorthum</i>  | <i>Aulacorthum solani</i>       |
| 30 | MEDB031-21 | BOLD:AAA7880  | 619 bp | 02-Oct-2018 | Lepidoptera | Crambidae        | <i>Nomophila</i>    | <i>Nomophila noctuella</i>      |
| 31 | MEDB032-21 |               | 459 bp | 02-Oct-2018 | Lepidoptera | Tortricidae      | <i>Endothenia</i>   | <i>Endothenia oblongana</i>     |

|    |            |              |        |             |             |               |                      |                                  |
|----|------------|--------------|--------|-------------|-------------|---------------|----------------------|----------------------------------|
| 32 | MEDB033-21 | BOLD:ADC3528 | 621 bp | 20-Apr-2018 | Lepidoptera | Praydidae     | <i>Prays</i>         | <i>Prays oleae</i>               |
| 33 | MEDB034-21 | BOLD:AAB3722 | 601 bp | 20-Apr-2018 | Lepidoptera | Praydidae     | <i>Prays</i>         | <i>Prays oleae</i>               |
| 34 | MEDB035-21 | BOLD:AAB3722 | 600 bp | 20-Apr-2018 | Lepidoptera | Praydidae     | <i>Prays</i>         | <i>Prays oleae</i>               |
| 35 | MEDB036-21 | BOLD:AAB3722 | 621 bp | 20-Apr-2018 | Lepidoptera | Praydidae     | <i>Prays</i>         | <i>Prays oleae</i>               |
| 36 | MEDB037-21 | BOLD:ADC3528 | 599 bp | 20-Apr-2018 | Lepidoptera | Praydidae     | <i>Prays</i>         | <i>Prays oleae</i>               |
| 37 | MEDB038-21 | BOLD:ACP7474 | 550 bp | 02-Jun-2018 | Lepidoptera | Pyralidae     | <i>Ematheudes</i>    | <i>Ematheudes punctella</i>      |
| 38 | MEDB039-21 | BOLD:AAA7740 | 502 bp | 20-Jun-2018 | Lepidoptera | Yponomeutidae | <i>Yponomeuta</i>    | <i>Yponomeuta evonymellus</i>    |
| 39 | MEDB040-21 | BOLD:AAB8994 | 610 bp | 20-Jun-2018 | Lepidoptera | Nolidae       | <i>Nycteola</i>      | <i>Nycteola siculana</i>         |
| 40 | MEDB041-21 | BOLD:AAB3722 | 658 bp | 20-Apr-2018 | Lepidoptera | Praydidae     | <i>Prays</i>         | <i>Prays oleae</i>               |
| 41 | MEDB042-21 | BOLD:AAF2514 | 625 bp | 02-Jun-2018 | Hymenoptera | Formicidae    | <i>Messor</i>        | <i>Messor cf. wasmanni</i>       |
| 42 | MEDB043-21 | BOLD:AAF2514 | 624 bp | 02-Jun-2018 | Hymenoptera | Formicidae    | <i>Messor</i>        | <i>Messor cf. wasmanni</i>       |
| 43 | MEDB044-21 | BOLD:AAF2514 | 620 bp | 02-Jun-2018 | Hymenoptera | Formicidae    | <i>Messor</i>        | <i>Messor cf. wasmanni</i>       |
| 44 | MEDB045-21 | BOLD:AAF2514 | 617 bp | 02-Jun-2018 | Hymenoptera | Formicidae    | <i>Messor</i>        | <i>Messor cf. wasmanni</i>       |
| 45 | MEDB046-21 | BOLD:ACX8144 | 629 bp | 25-Oct-2018 | Hymenoptera | Formicidae    | <i>Crematogaster</i> | <i>Crematogaster scutellaris</i> |
| 46 | MEDB047-21 | BOLD:ACX8144 | 619 bp | 25-Oct-2018 | Hymenoptera | Formicidae    | <i>Crematogaster</i> | <i>Crematogaster scutellaris</i> |
| 47 | MEDB048-21 | BOLD:ACX8144 | 620 bp | 25-Oct-2018 | Hymenoptera | Formicidae    | <i>Crematogaster</i> | <i>Crematogaster scutellaris</i> |
| 48 | MEDB049-21 | BOLD:AEI8565 | 618 bp | 01-Oct-2018 | Hymenoptera | Formicidae    | <i>Camponotus</i>    | <i>Camponotus lateralis</i>      |

|    |            |              |        |             |             |            |                      |                                  |
|----|------------|--------------|--------|-------------|-------------|------------|----------------------|----------------------------------|
| 49 | MEDB050-21 | BOLD:ABA9292 | 658 bp | 11-Jul-2018 | Hymenoptera | Formicidae | <i>Camponotus</i>    | <i>Camponotus piceus</i>         |
| 50 | MEDB051-21 | BOLD:AAU0034 | 625 bp | 20-Apr-2018 | Hymenoptera | Formicidae | <i>Lasius</i>        | <i>Lasius paralienus</i>         |
| 51 | MEDB052-21 | BOLD:AAU0034 | 655 bp | 11-May-2018 | Hymenoptera | Formicidae | <i>Lasius</i>        | <i>Lasius paralienus</i>         |
| 52 | MEDB053-21 | BOLD:AAU0034 | 623 bp | 20-Apr-2018 | Hymenoptera | Formicidae | <i>Lasius</i>        | <i>Lasius paralienus</i>         |
| 53 | MEDB054-21 | BOLD:AAU0034 | 616 bp | 11-May-2018 | Hymenoptera | Formicidae | <i>Lasius</i>        | <i>Lasius paralienus</i>         |
| 54 | MEDB055-21 | BOLD:AAE1002 | 622 bp | 01-Oct-2018 | Hymenoptera | Formicidae | <i>Formica</i>       | <i>Formica cunicularia</i>       |
| 55 | MEDB056-21 | BOLD:AAE1002 | 615 bp | 11-May-2018 | Hymenoptera | Formicidae | <i>Formica</i>       | <i>Formica cunicularia</i>       |
| 56 | MEDB057-21 | BOLD:AEI3070 | 609 bp | 01-Oct-2018 | Hymenoptera | Formicidae | <i>Solenopsis</i>    | <i>Solenopsis fugax</i>          |
| 57 | MEDB058-21 | BOLD:AEI4082 | 626 bp | 11-Jul-2018 | Hymenoptera | Formicidae | <i>Formica</i>       | <i>Formica cunicularia</i>       |
| 58 | MEDB059-21 | BOLD:AAE1002 | 609 bp | 11-May-2018 | Hymenoptera | Formicidae | <i>Formica</i>       | <i>Formica cunicularia</i>       |
| 59 | MEDB060-21 | BOLD:AAE1002 | 617 bp | 11-Jul-2018 | Hymenoptera | Formicidae | <i>Formica</i>       | <i>Formica cunicularia</i>       |
| 60 | MEDB061-21 | BOLD:AAU0716 | 621 bp | 11-May-2018 | Hymenoptera | Formicidae | <i>Plagiolepis</i>   | <i>Plagiolepis pygmaea</i>       |
| 61 | MEDB062-21 | BOLD:AAU0716 | 620 bp | 11-May-2018 | Hymenoptera | Formicidae | <i>Plagiolepis</i>   | <i>Plagiolepis pygmaea</i>       |
| 62 | MEDB063-21 | BOLD:AAU0034 | 615 bp | 02-Oct-2018 | Hymenoptera | Formicidae | <i>Lasius</i>        | <i>Lasius paralienus</i>         |
| 63 | MEDB064-21 | BOLD:AAU0716 | 621 bp | 11-May-2018 | Hymenoptera | Formicidae | <i>Plagiolepis</i>   | <i>Plagiolepis pygmaea</i>       |
| 64 | MEDB065-21 | BOLD:ACX8144 | 650 bp | 15-Sep-2018 | Hymenoptera | Formicidae | <i>Crematogaster</i> | <i>Crematogaster scutellaris</i> |
| 65 | MEDB066-21 | BOLD:ADT1651 | 590 bp | 15-Sep-2018 | Hymenoptera | Formicidae | <i>Aphaenogaster</i> | <i>Aphaenogaster picena</i>      |

|    |            |              |        |             |             |             |                      |                                  |
|----|------------|--------------|--------|-------------|-------------|-------------|----------------------|----------------------------------|
| 66 | MEDB067-21 | BOLD:AEF2549 | 578 bp | 02-Oct-2018 | Hymenoptera | Formicidae  | <i>Tetramorium</i>   | <i>Tetramorium semilaeve</i>     |
| 67 | MEDB068-21 | BOLD:AEF2549 | 613 bp | 02-Oct-2019 | Hymenoptera | Formicidae  | <i>Tetramorium</i>   | <i>Tetramorium semilaeve</i>     |
| 68 | MEDB069-21 | BOLD:ACX8144 | 620 bp | 15-Sep-2018 | Hymenoptera | Formicidae  | <i>Crematogaster</i> | <i>Crematogaster scutellaris</i> |
| 69 | MEDB070-21 | BOLD:ADT1651 | 613 bp | 12-Jul-2018 | Hymenoptera | Formicidae  | <i>Aphaenogaster</i> | <i>Aphaenogaster picena</i>      |
| 70 | MEDB071-21 | BOLD:AEF2549 | 620 bp | 02-Oct-2018 | Hymenoptera | Formicidae  | <i>Tetramorium</i>   | <i>Tetramorium semilaeve</i>     |
| 71 | MEDB072-21 | BOLD:AEH9717 | 620 bp | 11-Jul-2018 | Hymenoptera | Formicidae  | <i>Tetramorium</i>   | <i>Tetramorium semilaeve</i>     |
| 72 | MEDB073-21 | BOLD:AEH7853 | 610 bp | 14-Sep-2018 | Hymenoptera | Formicidae  | <i>Tetramorium</i>   | <i>Tetramorium semilaeve</i>     |
| 73 | MEDB074-21 | BOLD:AEF2549 | 613 bp | 02-Oct-2018 | Hymenoptera | Formicidae  | <i>Tetramorium</i>   | <i>Tetramorium semilaeve</i>     |
| 74 | MEDB075-21 | BOLD:AAU0034 | 618 bp | 11-Apr-2019 | Hymenoptera | Formicidae  | <i>Lasius</i>        | <i>Lasius paralienus</i>         |
| 75 | MEDB076-21 | BOLD:AAE1002 | 620 bp | 12-Jul-2018 | Hymenoptera | Formicidae  | <i>Formica</i>       | <i>Formica cunicularia</i>       |
| 76 | MEDB077-21 | BOLD:AAE1002 | 621 bp | 12-Jul-2018 | Hymenoptera | Formicidae  | <i>Formica</i>       | <i>Formica cunicularia</i>       |
| 77 | MEDB078-21 | BOLD:ABA9292 | 619 bp | 14-Sep-2018 | Hymenoptera | Formicidae  | <i>Camponotus</i>    | <i>Camponotus piceus</i>         |
| 78 | MEDB079-21 | BOLD:AAU0034 | 658 bp | 01-Oct-2018 | Hymenoptera | Formicidae  | <i>Lasius</i>        | <i>Lasius paralienus</i>         |
| 79 | MEDB080-21 | BOLD:AAE1002 | 657 bp | 16-Sep-2018 | Hymenoptera | Formicidae  | <i>Formica</i>       | <i>Formica cunicularia</i>       |
| 80 | MEDB081-21 | BOLD:AEH3543 | 628 bp | 02-Jul-2018 | Haplotaxida | Lumbricidae | <i>Octodrilus</i>    |                                  |
| 81 | MEDB082-21 | BOLD:AEH3543 | 634 bp | 02-Jul-2018 | Haplotaxida | Lumbricidae | <i>Octodrilus</i>    |                                  |
| 82 | MEDB083-21 | BOLD:AEH3543 | 620 bp | 02-Jul-2018 | Haplotaxida | Lumbricidae | <i>Octodrilus</i>    |                                  |

|    |            |              |        |             |             |             |                   |  |
|----|------------|--------------|--------|-------------|-------------|-------------|-------------------|--|
| 83 | MEDB084-21 | BOLD:AEH3543 | 620 bp | 02-Jul-2018 | Haplotaxida | Lumbricidae | <i>Octodrilus</i> |  |
| 84 | MEDB085-21 | BOLD:AEH3543 | 630 bp | 02-Jul-2018 | Haplotaxida | Lumbricidae | <i>Octodrilus</i> |  |
| 85 | MEDB086-21 | BOLD:AEH3543 | 625 bp | 02-Jul-2018 | Haplotaxida | Lumbricidae | <i>Octodrilus</i> |  |
| 86 | MEDB087-21 | BOLD:AEH3543 | 618 bp | 02-Jul-2018 | Haplotaxida | Lumbricidae | <i>Octodrilus</i> |  |
| 87 | MEDB088-21 | BOLD:AEH3543 | 634 bp | 01-Oct-2018 | Haplotaxida | Lumbricidae | <i>Octodrilus</i> |  |
| 88 | MEDB089-21 | BOLD:AEH3543 | 621 bp | 20-Nov-2019 | Haplotaxida | Lumbricidae | <i>Octodrilus</i> |  |
| 89 | MEDB090-21 |              | 597 bp | 20-Nov-2019 | Haplotaxida | Lumbricidae | <i>Octodrilus</i> |  |
| 90 | MEDB091-21 | BOLD:AEH3543 | 620 bp | 20-Nov-2019 | Haplotaxida | Lumbricidae | <i>Octodrilus</i> |  |
| 91 | MEDB092-21 |              | 613 bp | 20-Nov-2019 | Haplotaxida | Lumbricidae | <i>Octodrilus</i> |  |
| 92 | MEDB093-21 | BOLD:AEH3543 | 601 bp | 20-Nov-2019 | Haplotaxida | Lumbricidae | <i>Octodrilus</i> |  |
| 93 | MEDB094-21 | BOLD:AEH3543 | 601 bp | 20-Nov-2019 | Haplotaxida | Lumbricidae | <i>Octodrilus</i> |  |
| 94 | MEDB095-21 | BOLD:AEH3543 | 621 bp | 20-Nov-2019 | Haplotaxida | Lumbricidae | <i>Octodrilus</i> |  |
| 95 | MEDB096-21 | BOLD:AEH3542 | 519 bp | 02-Jul-2018 | Haplotaxida | Lumbricidae | <i>Octodrilus</i> |  |
| 96 | MEDB097-21 | BOLD:AEH3543 | 619 bp | 02-Jul-2018 | Haplotaxida | Lumbricidae | <i>Octodrilus</i> |  |
| 97 | MEDB098-21 | BOLD:AEH4756 | 539 bp | 02-Jul-2018 | Haplotaxida | Lumbricidae | <i>Octodrilus</i> |  |
| 98 | MEDB099-21 | BOLD:AEH3543 | 624 bp | 02-Jul-2018 | Haplotaxida | Lumbricidae | <i>Octodrilus</i> |  |
| 99 | MEDB100-21 | BOLD:AEH3542 | 625 bp | 02-Jul-2018 | Haplotaxida | Lumbricidae | <i>Octodrilus</i> |  |

|     |            |              |        |             |                  |                 |                        |                                 |
|-----|------------|--------------|--------|-------------|------------------|-----------------|------------------------|---------------------------------|
| 100 | MEDB101-21 | BOLD:AEH3543 | 649 bp | 27-Oct-2019 | Haplotaxida      | Lumbricidae     | <i>Octodrilus</i>      |                                 |
| 101 | MEDB102-21 | BOLD:AEH7552 | 625 bp | 25-Oct-2018 | Isopoda          | Armadillidiidae | <i>Armadillidium</i>   |                                 |
| 102 | MEDB104-21 | BOLD:ADV9660 | 621 bp | 28-Oct-2019 | Isopoda          | Philosciidae    | <i>Chaetophiloscia</i> | <i>Chaetophiloscia elongata</i> |
| 103 | MEDB105-21 | BOLD:AAE6611 | 619 bp | 02-Jun-2018 | Isopoda          | Armadillidiidae | <i>Armadillidium</i>   | <i>Armadillidium vulgare</i>    |
| 104 | MEDB106-21 | BOLD:AEH3738 | 600 bp | 14-Sep-2018 | Isopoda          | Armadillidiidae | <i>Armadillidium</i>   | <i>Armadillidium vulgare</i>    |
| 105 | MEDB107-21 | BOLD:AEH7907 | 629 bp | 25-Oct-2018 | Isopoda          | Porcellionidae  | <i>Porcellionides</i>  |                                 |
| 106 | MEDB108-21 | BOLD:AEH7907 | 609 bp | 25-Oct-2018 | Isopoda          | Porcellionidae  | <i>Porcellionides</i>  |                                 |
| 107 | MEDB109-21 | BOLD:AAE6611 | 621 bp | 25-May-2019 | Isopoda          | Armadillidiidae | <i>Armadillidium</i>   | <i>Armadillidium vulgare</i>    |
| 108 | MEDB110-21 | BOLD:AAE6611 | 642 bp | 25-May-2019 | Isopoda          | Armadillidiidae | <i>Armadillidium</i>   | <i>Armadillidium vulgare</i>    |
| 109 | MEDB111-21 | BOLD:AEH7552 | 621 bp | 13-Apr-2019 | Isopoda          | Trachelipodidae | <i>Mongoloniscus</i>   |                                 |
| 110 | MEDB112-21 | BOLD:AAH4111 | 580 bp | 25-Oct-2018 | Isopoda          | Armadillidiidae | <i>Armadillidium</i>   | <i>Armadillidium vulgare</i>    |
| 111 | MEDB129-21 | BOLD:AEH5984 | 625 bp | 25-Oct-2018 | Entomobryomorpha | Entomobryidae   | <i>Orchesella</i>      |                                 |
| 112 | MEDB130-21 | BOLD:AEH5615 | 613 bp | 12-Apr-2019 | Entomobryomorpha | Entomobryidae   | <i>Lepidocyrtus</i>    |                                 |
| 113 | MEDB131-21 | BOLD:AEE1997 | 619 bp | 12-Apr-2019 | Entomobryomorpha | Entomobryidae   | <i>Orchesella</i>      |                                 |
| 114 | MEDB132-21 | BOLD:AEH5615 | 621 bp | 11-Apr-2019 | Entomobryomorpha | Entomobryidae   | <i>Lepidocyrtus</i>    |                                 |
| 115 | MEDB133-21 | BOLD:AEH5615 | 613 bp | 25-Oct-2018 | Entomobryomorpha | Entomobryidae   | <i>Lepidocyrtus</i>    |                                 |
| 116 | MEDB134-21 | BOLD:AEH5615 | 550 bp | 25-Oct-2018 | Entomobryomorpha | Entomobryidae   | <i>Lepidocyrtus</i>    |                                 |

|     |            |              |        |             |                  |               |                         |                                  |
|-----|------------|--------------|--------|-------------|------------------|---------------|-------------------------|----------------------------------|
| 117 | MEDB135-21 | BOLD:AEE1997 | 600 bp | 11-Apr-2019 | Entomobryomorpha | Entomobryidae | <i>Orchesella</i>       |                                  |
| 118 | MEDB136-21 | BOLD:AEE1997 | 621 bp | 11-Apr-2019 | Entomobryomorpha | Entomobryidae | <i>Orchesella</i>       |                                  |
| 119 | MEDB137-21 | BOLD:ACP8161 | 627 bp | 12-Jul-2018 | Diptera          | Sciaridae     |                         |                                  |
| 120 | MEDB139-21 |              | 498 bp | 19-Apr-2018 | Diptera          | Heleomyzidae  | <i>Tephrochlamys</i>    | <i>Tephrochlamys rufiventris</i> |
| 121 | MEDB140-21 | BOLD:ACR3766 | 600 bp | 19-Apr-2018 | Diptera          | Chironomidae  |                         |                                  |
| 122 | MEDB141-21 | BOLD:ADK3407 | 620 bp | 25-Oct-2018 | Diptera          | Tachinidae    | <i>Nemorilla</i>        | <i>Nemorilla maculosa</i>        |
| 123 | MEDB142-21 | BOLD:AEH3449 | 599 bp | 25-Oct-2018 | Diptera          | Psilidae      | <i>Psila</i>            |                                  |
| 124 | MEDB143-21 |              | 519 bp | 14-Sep-2018 | Diptera          | Sciaridae     | <i>Corynoptera</i>      | <i>Corynoptera perpusilla</i>    |
| 125 | MEDB144-21 | BOLD:ACO9522 | 600 bp | 12-May-2018 | Diptera          | Sciaridae     | <i>Pseudolycoriella</i> |                                  |
| 126 | MEDB145-21 | BOLD:AAC2499 | 600 bp | 10-Jul-2018 | Diptera          | Drosophilidae | <i>Drosophila</i>       | <i>Drosophila suzukii</i>        |
| 127 | MEDB146-21 | BOLD:AAG2511 | 658 bp | 20-Apr-2018 | Diptera          | Anthomyiidae  | <i>Delia</i>            | <i>Delia platura</i>             |
| 128 | MEDB149-21 |              | 470 bp | 20-Apr-2018 | Diptera          | Empididae     | <i>Hilara</i>           |                                  |
| 129 | MEDB150-21 | BOLD:AAG2511 | 557 bp | 20-Apr-2018 | Diptera          | Anthomyiidae  | <i>Delia</i>            | <i>Delia platura</i>             |
| 130 | MEDB151-21 | BOLD:AEB0570 | 620 bp | 20-Apr-2018 | Diptera          | Agromyzidae   | <i>Agromyza</i>         | <i>Agromyza filipendulae</i>     |
| 131 | MEDB152-21 | BOLD:AAP2864 | 630 bp | 20-Apr-2018 | Diptera          | Ephydriidae   | <i>Hydrellia</i>        | <i>Hydrellia griseola</i>        |
| 132 | MEDB153-21 | BOLD:AEH5541 | 559 bp | 20-Apr-2018 | Diptera          | Agromyzidae   | <i>Liriomyza</i>        |                                  |
| 133 | MEDB154-21 | BOLD:AAG8493 | 600 bp | 11-May-2018 | Diptera          | Drosophilidae | <i>Scaptomyza</i>       | <i>Scaptomyza pallida</i>        |



|     |            |              |        |             |         |                |                   |                            |
|-----|------------|--------------|--------|-------------|---------|----------------|-------------------|----------------------------|
| 134 | MEDB155-21 | BOLD:AAG8493 | 619 bp | 15-Sep-2018 | Diptera | Drosophilidae  | <i>Scaptomyza</i> | <i>Scaptomyza pallida</i>  |
| 135 | MEDB156-21 | BOLD:AEI4458 | 588 bp | 15-Sep-2018 | Diptera | Ephydriidae    | <i>Psilopa</i>    | <i>Psilopa obscuripes</i>  |
| 136 | MEDB157-21 | BOLD:AAP2864 | 600 bp | 15-Sep-2018 | Diptera | Ephydriidae    | <i>Hydrellia</i>  | <i>Hydrellia griseola</i>  |
| 137 | MEDB158-21 | BOLD:AAG7016 | 610 bp | 15-Sep-2018 | Diptera | Ephydriidae    | <i>Psilopa</i>    | <i>Psilopa obscuripes</i>  |
| 138 | MEDB159-21 | BOLD:AAG7016 | 600 bp | 15-Sep-2018 | Diptera | Ephydriidae    | <i>Psilopa</i>    | <i>Psilopa obscuripes</i>  |
| 139 | MEDB160-21 | BOLD:AAP2864 | 609 bp | 15-Sep-2018 | Diptera | Ephydriidae    | <i>Hydrellia</i>  | <i>Hydrellia griseola</i>  |
| 140 | MEDB161-21 | BOLD:AAG8493 | 629 bp | 15-Sep-2018 | Diptera | Drosophilidae  | <i>Scaptomyza</i> | <i>Scaptomyza pallida</i>  |
| 141 | MEDB162-21 | BOLD:AEI2097 | 549 bp | 15-Sep-2018 | Diptera | Drosophilidae  | <i>Scaptomyza</i> |                            |
| 142 | MEDB163-21 | BOLD:AAG7016 | 579 bp | 15-Sep-2018 | Diptera | Ephydriidae    | <i>Psilopa</i>    | <i>Psilopa obscuripes</i>  |
| 143 | MEDB164-21 | BOLD:AAG7016 | 621 bp | 15-Sep-2018 | Diptera | Ephydriidae    | <i>Psilopa</i>    | <i>Psilopa obscuripes</i>  |
| 144 | MEDB165-21 | BOLD:AAG7016 | 621 bp | 15-Sep-2018 | Diptera | Ephydriidae    | <i>Psilopa</i>    | <i>Psilopa obscuripes</i>  |
| 145 | MEDB166-21 | BOLD:AAG8493 | 619 bp | 15-Sep-2018 | Diptera | Drosophilidae  | <i>Scaptomyza</i> | <i>Scaptomyza pallida</i>  |
| 146 | MEDB167-21 | BOLD:AEH4403 | 658 bp | 02-Oct-2018 | Diptera | Dolichopodidae | <i>Dolichopus</i> |                            |
| 147 | MEDB168-21 | BOLD:AEH4192 | 630 bp | 25-May-2019 | Diptera | Calliphoridae  | <i>Lucilia</i>    |                            |
| 148 | MEDB169-21 | BOLD:ABX9035 | 629 bp | 02-Oct-2018 | Diptera | Anthomyiidae   | <i>Anthomyia</i>  | <i>Anthomyia pluvialis</i> |
| 149 | MEDB170-21 | BOLD:ACP8161 | 616 bp | 15-Sep-2018 | Diptera | Sciaridae      |                   |                            |
| 150 | MEDB171-21 | BOLD:ACB4482 | 658 bp | 25-Oct-2018 | Diptera | Sarcophagidae  | <i>Sarcophaga</i> | <i>Sarcophaga anaces</i>   |

|     |            |              |        |             |           |                  |                       |  |
|-----|------------|--------------|--------|-------------|-----------|------------------|-----------------------|--|
| 151 | MEDB188-21 | BOLD:AEI3181 | 610 bp | 20-Apr-2018 | Hemiptera | Cicadellidae     | <i>Scaphoideus</i>    |  |
| 152 | MEDB189-21 | BOLD:ADL9326 | 620 bp | 20-Apr-2018 | Hemiptera | Geocoridae       | <i>Geocoris</i>       |  |
| 153 | MEDB190-21 | BOLD:AEH5584 | 626 bp | 25-Oct-2018 | Hemiptera | Rhyparochromidae | <i>Sphragisticus</i>  |  |
| 154 | MEDB191-21 | BOLD:AEH6855 | 626 bp | 12-Jul-2018 | Hemiptera | Cicadellidae     | <i>Selenocephalus</i> |  |
| 155 | MEDB192-21 | BOLD:AEH6855 | 621 bp | 12-Jul-2018 | Hemiptera | Cicadellidae     | <i>Selenocephalus</i> |  |
| 156 | MEDB193-21 | BOLD:AEI4937 | 641 bp | 19-Jun-2018 | Hemiptera | Cicadellidae     | <i>Synophropsis</i>   |  |
| 157 | MEDB194-21 | BOLD:AEH7088 | 620 bp | 19-Jun-2018 | Hemiptera | Cicadellidae     | <i>Psammotettix</i>   |  |
| 158 | MEDB195-21 | BOLD:AEH7088 | 601 bp | 19-Jun-2018 | Hemiptera | Cicadellidae     | <i>Psammotettix</i>   |  |
| 159 | MEDB196-21 | BOLD:AEH5636 | 620 bp | 12-May-2018 | Hemiptera | Nabidae          | <i>Himacerus</i>      |  |
| 160 | MEDB197-21 |              | 620 bp | 26-Oct-2018 | Hemiptera | Nabidae          | <i>Himacerus</i>      |  |
| 161 | MEDB198-21 |              | 601 bp | 20-Jun-2018 | Hemiptera | Cicadellidae     |                       |  |
| 162 | MEDB199-21 | BOLD:ADP0985 | 600 bp | 26-Oct-2018 | Hemiptera | Reduviidae       | <i>Coranus</i>        |  |
| 163 | MEDB200-21 | BOLD:AEH4330 | 601 bp | 19-Jun-2018 | Hemiptera | Issidae          | <i>Agalmatium</i>     |  |
| 164 | MEDB201-21 | BOLD:ADL9034 | 625 bp | 25-Oct-2018 | Hemiptera | Pentatomidae     | <i>Acrosternum</i>    |  |
| 165 | MEDB202-21 | BOLD:ADW7496 | 621 bp | 02-Oct-2018 | Hemiptera | Cicadellidae     | <i>Agallia</i>        |  |
| 166 | MEDB203-21 | BOLD:ADW7496 | 601 bp | 11-Jul-2018 | Hemiptera | Cicadellidae     | <i>Agallia</i>        |  |
| 167 | MEDB204-21 | BOLD:ADW7496 | 621 bp | 11-Jul-2018 | Hemiptera | Cicadellidae     | <i>Agallia</i>        |  |

|     |            |              |        |             |                  |               |                      |                                |
|-----|------------|--------------|--------|-------------|------------------|---------------|----------------------|--------------------------------|
| 168 | MEDB205-21 | BOLD:AEI2929 | 621 bp | 25-Oct-2018 | Hymenoptera      | Formicidae    | <i>Camponotus</i>    |                                |
| 169 | MEDB206-21 | BOLD:AEI2929 | 619 bp | 25-Oct-2018 | Hymenoptera      | Formicidae    | <i>Camponotus</i>    |                                |
| 170 | MEDB207-21 | BOLD:AEI2929 | 585 bp | 21-Jun-2018 | Hymenoptera      | Formicidae    | <i>Camponotus</i>    |                                |
| 171 | MEDB208-21 | BOLD:AEI2929 | 620 bp | 16-Sep-2018 | Hymenoptera      | Formicidae    | <i>Camponotus</i>    |                                |
| 172 | MEDB209-21 | BOLD:AEI2929 | 613 bp | 11-Jul-2018 | Hymenoptera      | Formicidae    | <i>Camponotus</i>    |                                |
| 173 | MEDB210-21 | BOLD:AEI2929 | 619 bp | 01-Oct-2018 | Hymenoptera      | Formicidae    | <i>Camponotus</i>    |                                |
| 174 | MEDB211-21 | BOLD:AEI2929 | 619 bp | 11-Jul-2018 | Hymenoptera      | Formicidae    | <i>Camponotus</i>    |                                |
| 175 | MEDB212-21 | BOLD:AEH9800 | 620 bp | 11-Jul-2018 | Hymenoptera      | Formicidae    | <i>Crematogaster</i> |                                |
| 176 | MEDB213-21 | BOLD:AEI2929 | 658 bp | 16-Sep-2018 | Hymenoptera      | Formicidae    | <i>Camponotus</i>    |                                |
| 177 | MEDB214-21 | BOLD:AEH9800 | 612 bp | 02-Oct-2018 | Hymenoptera      | Formicidae    | <i>Crematogaster</i> |                                |
| 178 | MEDB215-21 | BOLD:ABA8661 | 621 bp | 12-Apr-2018 | Hymenoptera      | Mutillidae    | <i>Myrmilla</i>      | <i>Myrmilla erythrocephala</i> |
| 179 | MEDB216-21 | BOLD:AEI2929 | 610 bp | 02-Oct-2018 | Hymenoptera      | Formicidae    | <i>Camponotus</i>    |                                |
| 180 | MEDB217-21 | BOLD:AEI8965 | 615 bp | 12-Jul-2018 | Hymenoptera      | Formicidae    | <i>Pheidole</i>      | <i>Pheidole pallidula</i>      |
| 181 | MEDB218-21 | BOLD:AEI8965 | 610 bp | 14-Sep-2018 | Hymenoptera      | Formicidae    | <i>Pheidole</i>      | <i>Pheidole pallidula</i>      |
| 182 | MEDB219-21 | BOLD:AEI2437 | 614 bp | 15-Sep-2018 | Hymenoptera      | Formicidae    | <i>Tapinoma</i>      |                                |
| 183 | MEDB220-21 | BOLD:AEH9402 | 620 bp | 12-Apr-2019 | Entomobryomorpha | Entomobryidae | <i>Heteromurus</i>   |                                |
| 184 | MEDB221-21 | BOLD:AEH5615 | 621 bp | 12-Apr-2019 | Entomobryomorpha | Entomobryidae | <i>Lepidocyrtus</i>  |                                |

|     |            |              |        |             |                  |                 |                      |                              |
|-----|------------|--------------|--------|-------------|------------------|-----------------|----------------------|------------------------------|
| 185 | MEDB222-21 | BOLD:AEH5615 | 614 bp | 01-Oct-2018 | Entomobryomorpha | Entomobryidae   | <i>Lepidocyrtus</i>  |                              |
| 186 | MEDB223-21 | BOLD:AEH5615 | 620 bp | 01-Oct-2018 | Entomobryomorpha | Entomobryidae   | <i>Lepidocyrtus</i>  |                              |
| 187 | MEDB224-21 | BOLD:AEH5615 | 600 bp | 01-Oct-2018 | Entomobryomorpha | Entomobryidae   | <i>Lepidocyrtus</i>  |                              |
| 188 | MEDB225-21 | BOLD:AEE1997 | 621 bp | 11-Apr-2019 | Entomobryomorpha | Entomobryidae   | <i>Orchesella</i>    |                              |
| 189 | MEDB226-21 | BOLD:AEI1132 | 600 bp | 20-Nov-2019 | Haplotaxida      | Lumbricidae     | <i>Octodrilus</i>    |                              |
| 190 | MEDB227-21 | BOLD:AA5615  | 589 bp | 02-Jun-2018 | Lepidoptera      | Tortricidae     | <i>Cnephasia</i>     | <i>Cnephasia ecullyana</i>   |
| 191 | MEDB228-21 | BOLD:AEH7907 | 658 bp | 02-Jun-2018 | Isopoda          | Porcellionidae  |                      |                              |
| 192 | MEDB229-21 | BOLD:AEH7907 | 651 bp | 02-Jun-2018 | Isopoda          | Porcellionidae  |                      |                              |
| 193 | MEDB230-21 | BOLD:AEH7907 | 658 bp | 02-Jun-2018 | Isopoda          | Porcellionidae  |                      |                              |
| 194 | MEDB231-21 | BOLD:AEH7907 | 658 bp | 02-Jun-2018 | Isopoda          | Porcellionidae  |                      |                              |
| 195 | MEDB232-21 | BOLD:AAE6611 | 658 bp | 24-Sep-2018 | Isopoda          | Armadillidiidae | <i>Armadillidium</i> | <i>Armadillidium vulgare</i> |
| 196 | MEDB233-21 | BOLD:AEH7907 | 618 bp | 15-Oct-2018 | Isopoda          | Porcellionidae  |                      |                              |
| 197 | MEDB234-21 | BOLD:AAE6611 | 658 bp | 24-Sep-2018 | Isopoda          | Armadillidiidae | <i>Armadillidium</i> | <i>Armadillidium vulgare</i> |
| 198 | MEDB235-21 | BOLD:AEH7907 | 618 bp | 24-Sep-2018 | Isopoda          | Porcellionidae  |                      |                              |
| 199 | MEDB236-21 | BOLD:AEJ5947 | 593 bp | 14-Sep-2018 | Isopoda          | Armadillidiidae | <i>Armadillidium</i> |                              |
| 200 | MEDB237-21 | BOLD:AEH7907 | 658 bp | 25-Oct-2018 | Isopoda          |                 |                      |                              |
| 201 | MEDB238-21 | BOLD:AAE6611 | 617 bp | 14-Sep-2018 | Isopoda          |                 |                      |                              |

|     |            |              |        |             |             |                 |                      |                              |
|-----|------------|--------------|--------|-------------|-------------|-----------------|----------------------|------------------------------|
| 202 | MEDB239-21 | BOLD:AEH7552 | 658 bp | 20-Nov-2019 | Isopoda     |                 |                      |                              |
| 203 | MEDB240-21 | BOLD:AEH7552 | 658 bp | 20-Nov-2019 | Isopoda     |                 |                      |                              |
| 204 | MEDB241-21 | BOLD:AEH7552 | 658 bp | 20-Nov-2019 | Isopoda     |                 |                      |                              |
| 205 | MEDB242-21 | BOLD:AEH7552 | 612 bp | 20-Nov-2019 | Isopoda     |                 |                      |                              |
| 206 | MEDB243-21 | BOLD:AEH7552 | 540 bp | 20-Nov-2019 | Isopoda     |                 |                      |                              |
| 207 | MEDB244-21 | BOLD:AEH7552 | 614 bp | 20-Nov-2019 | Isopoda     |                 |                      |                              |
| 208 | MEDB245-21 | BOLD:AEH7552 | 614 bp | 20-Nov-2019 | Isopoda     |                 |                      |                              |
| 209 | MEDB246-21 | BOLD:AEH7552 | 599 bp | 20-Nov-2019 | Isopoda     |                 |                      |                              |
| 210 | MEDB247-21 | BOLD:AEH7907 | 658 bp | 20-Nov-2019 | Isopoda     |                 |                      |                              |
| 211 | MEDB248-21 | BOLD:AEH7907 | 658 bp | 20-Nov-2019 | Isopoda     |                 |                      |                              |
| 212 | MEDB249-21 | BOLD:AAE6611 | 603 bp | 25-Oct-2018 | Isopoda     | Armadillidiidae | <i>Armadillidium</i> | <i>Armadillidium vulgare</i> |
| 213 | MEDB250-21 | BOLD:AEJ4578 | 612 bp | 20-Nov-2019 | Isopoda     |                 |                      |                              |
| 214 | MEDB251-21 | BOLD:AAE6611 | 658 bp | 20-Nov-2019 | Isopoda     | Armadillidiidae | <i>Armadillidium</i> | <i>Armadillidium vulgare</i> |
| 215 | MEDB252-21 | BOLD:AAE6611 | 658 bp | 20-Nov-2019 | Isopoda     | Armadillidiidae | <i>Armadillidium</i> | <i>Armadillidium vulgare</i> |
| 216 | MEDB253-21 | BOLD:AEJ1183 | 658 bp | 02-Jun-2018 | Haplotaxida | Lumbricidae     | <i>Octodrilus</i>    |                              |
| 217 | MEDB254-21 | BOLD:AEH3543 | 658 bp | 02-Jun-2018 | Haplotaxida | Lumbricidae     | <i>Octodrilus</i>    |                              |
| 218 | MEDB255-21 | BOLD:AEH3543 | 658 bp | 02-Jun-2018 | Haplotaxida | Lumbricidae     | <i>Octodrilus</i>    |                              |

|     |            |              |        |             |             |                 |                   |                           |
|-----|------------|--------------|--------|-------------|-------------|-----------------|-------------------|---------------------------|
| 219 | MEDB256-21 | BOLD:AEH3543 | 658 bp | 02-Jun-2018 | Haplotaxida | Lumbricidae     | <i>Octodrilus</i> |                           |
| 220 | MEDB257-21 | BOLD:AEH3543 | 658 bp | 02-Jun-2018 | Haplotaxida | Lumbricidae     | <i>Octodrilus</i> |                           |
| 221 | MEDB258-21 | BOLD:AEH3543 | 658 bp | 02-Jun-2018 | Haplotaxida | Lumbricidae     | <i>Octodrilus</i> |                           |
| 222 | MEDB259-21 | BOLD:AEH3543 | 605 bp | 02-Jun-2018 | Haplotaxida | Lumbricidae     | <i>Octodrilus</i> |                           |
| 223 | MEDB260-21 | BOLD:AEH3542 | 605 bp | 02-Jun-2018 | Haplotaxida | Lumbricidae     | <i>Octodrilus</i> |                           |
| 224 | MEDB261-21 | BOLD:AEH3542 | 616 bp | 01-Jun-2018 | Haplotaxida | Lumbricidae     | <i>Octodrilus</i> |                           |
| 225 | MEDB262-21 | BOLD:AEJ1182 | 616 bp | 01-Jun-2018 | Haplotaxida | Lumbricidae     | <i>Octodrilus</i> |                           |
| 226 | MEDB263-21 | BOLD:AEH3542 | 605 bp | 01-Jun-2018 | Haplotaxida | Lumbricidae     | <i>Octodrilus</i> |                           |
| 227 | MEDB264-21 | BOLD:AEJ1182 | 617 bp | 01-Jun-2018 | Haplotaxida | Lumbricidae     | <i>Octodrilus</i> |                           |
| 228 | MEDB265-21 | BOLD:AEH3542 | 658 bp | 01-Jun-2018 | Haplotaxida | Lumbricidae     | <i>Octodrilus</i> |                           |
| 229 | MEDB266-21 |              | 658 bp | 12-May-2018 | Diptera     | Lauxaniidae     |                   |                           |
| 230 | MEDB267-21 |              | 658 bp | 02-Oct-2018 | Diptera     | Ceratopogonidae |                   |                           |
| 231 | MEDB268-21 | BOLD:AAB1148 | 615 bp | 15-Sep-2018 | Diptera     | Chloropidae     | <i>Oscinella</i>  |                           |
| 232 | MEDB269-21 | BOLD:AAG7016 | 613 bp | 15-Sep-2018 | Diptera     | Ephydriidae     | <i>Psilopa</i>    | <i>Psilopa obscuripes</i> |
| 233 | MEDB270-21 | BOLD:AAG8493 | 614 bp | 15-Sep-2018 | Diptera     | Drosophilidae   | <i>Scaptomyza</i> | <i>Scaptomyza pallida</i> |
| 234 | MEDB271-21 | BOLD:AEJ1095 | 658 bp | 15-Sep-2018 | Diptera     | Chloropidae     |                   |                           |
| 235 | MEDB272-21 | BOLD:AAB1148 | 658 bp | 15-Sep-2018 | Diptera     | Chloropidae     | <i>Oscinella</i>  |                           |

|     |            |              |        |             |         |               |                   |                           |
|-----|------------|--------------|--------|-------------|---------|---------------|-------------------|---------------------------|
| 236 | MEDB273-21 | BOLD:AAG6948 | 658 bp | 15-Sep-2018 | Diptera | Ephydridae    | <i>Psilopa</i>    | <i>Psilopa nitidula</i>   |
| 237 | MEDB274-21 | BOLD:AAG7016 | 658 bp | 15-Sep-2018 | Diptera | Ephydridae    | <i>Psilopa</i>    | <i>Psilopa obscuripes</i> |
| 238 | MEDB275-21 | BOLD:AAG7016 | 556 bp | 15-Sep-2018 | Diptera | Ephydridae    | <i>Psilopa</i>    | <i>Psilopa obscuripes</i> |
| 239 | MEDB276-21 | BOLD:ABY7486 | 615 bp | 15-Sep-2018 | Diptera | Ephydridae    | <i>Psilopa</i>    |                           |
| 240 | MEDB277-21 | BOLD:AAG7016 | 617 bp | 15-Sep-2018 | Diptera | Ephydridae    | <i>Psilopa</i>    | <i>Psilopa obscuripes</i> |
| 241 | MEDB278-21 | BOLD:AAG8493 | 612 bp | 15-Sep-2018 | Diptera | Drosophilidae | <i>Scaptomyza</i> | <i>Scaptomyza pallida</i> |
| 242 | MEDB279-21 | BOLD:AEJ3339 | 658 bp | 15-Sep-2018 | Diptera | Ulidiidae     | <i>Herina</i>     |                           |
| 243 | MEDB280-21 | BOLD:AEJ3339 | 658 bp | 15-Sep-2018 | Diptera | Ulidiidae     | <i>Herina</i>     |                           |
| 244 | MEDB281-21 | BOLD:AEJ3339 | 632 bp | 15-Sep-2018 | Diptera | Ulidiidae     | <i>Herina</i>     |                           |
| 245 | MEDB282-21 | BOLD:AAG7016 | 617 bp | 15-Sep-2018 | Diptera | Ephydridae    | <i>Psilopa</i>    | <i>Psilopa obscuripes</i> |
| 246 | MEDB283-21 | BOLD:ABY7486 | 615 bp | 15-Sep-2018 | Diptera | Ephydridae    | <i>Psilopa</i>    |                           |
| 247 | MEDB284-21 | BOLD:AAG8493 | 658 bp | 15-Sep-2018 | Diptera | Drosophilidae | <i>Scaptomyza</i> | <i>Scaptomyza pallida</i> |
| 248 | MEDB285-21 | BOLD:ACE4540 | 658 bp | 01-Jun-2018 | Diptera | Anthomyiidae  | <i>Anthomyia</i>  | <i>Anthomyia liturata</i> |
| 249 | MEDB286-21 | BOLD:AAG2511 | 658 bp | 01-Jun-2018 | Diptera | Anthomyiidae  | <i>Delia</i>      | <i>Delia platura</i>      |
| 250 | MEDB287-21 | BOLD:AEK1625 | 618 bp | 12-Jul-2018 | Diptera | Sciaridae     |                   |                           |
| 251 | MEDB288-21 | BOLD:ACP8161 | 612 bp | 16-Sep-2018 | Diptera | Sciaridae     |                   |                           |
| 252 | MEDB289-21 | BOLD:ACX3033 | 617 bp | 02-Oct-2018 | Diptera | Cecidomyiidae |                   |                           |

|     |            |              |        |             |                  |                 |                      |                              |
|-----|------------|--------------|--------|-------------|------------------|-----------------|----------------------|------------------------------|
| 253 | MEDB290-21 | BOLD:ACP8161 | 616 bp | 16-Sep-2018 | Diptera          | Sciaridae       |                      |                              |
| 254 | MEDB291-21 | BOLD:AAB3722 | 614 bp | 19-Apr-2018 | Lepidoptera      | Praydidae       | <i>Prays</i>         | <i>Prays oleae</i>           |
| 255 | MEDB292-21 | BOLD:AAC6908 | 616 bp | 19-Apr-2018 | Lepidoptera      | Saturniidae     | <i>Saturnia</i>      | <i>Saturnia caecigena</i>    |
| 256 | MEDB293-21 | BOLD:AAB7075 | 658 bp | 11-May-2018 | Lepidoptera      | Geometridae     | <i>Aspitates</i>     | <i>Aspitates ochrearia</i>   |
| 257 | MEDB294-21 | BOLD:AAA1513 | 658 bp | 11-Jul-2018 | Lepidoptera      | Plutellidae     | <i>Plutella</i>      | <i>Plutella xylostella</i>   |
| 258 | MEDB295-21 | BOLD:AAE6611 | 618 bp | 18-Jun-2019 | Isopoda          | Armadillidiidae | <i>Armadillidium</i> | <i>Armadillidium vulgare</i> |
| 259 | MEDB296-21 | BOLD:AEI9556 | 609 bp | 16-Sep-2018 | Hemiptera        | Tettigometridae | <i>Tettigometra</i>  |                              |
| 260 | MEDB297-21 | BOLD:ACY0919 | 621 bp | 12-May-2018 | Hemiptera        | Miridae         | <i>Psallus</i>       | <i>Psallus quercus</i>       |
| 261 | MEDB298-21 | BOLD:AEJ0895 | 614 bp | 19-Apr-2018 | Symphyleona      | Sminthuridae    |                      |                              |
| 262 | MEDB309-21 | BOLD:AEH7552 | 523 bp | 20-Nov-2019 | Isopoda          |                 |                      |                              |
| 263 | MEDB310-21 | BOLD:AAG8493 | 573 bp | 15-Sep-2018 | Diptera          | Drosophilidae   | <i>Scaptomyza</i>    | <i>Scaptomyza pallida</i>    |
| 264 | MEDB311-21 | BOLD:AAG9974 | 658 bp | 15-Sep-2018 | Diptera          | Lonchopteridae  | <i>Lonchoptera</i>   | <i>Lonchoptera bifurcata</i> |
| 265 | MEDB428-22 |              | 658 bp | 02-Jun-2018 | Haplotaxida      | Lumbricidae     | <i>Octodrilus</i>    | <i>Octodrilus sp.</i>        |
| 266 | MEDB429-21 | BOLD:AEI2929 | 658 bp | 14-Sep-2018 | Hymenoptera      | Formicidae      | <i>Camponotus</i>    |                              |
| 267 | MEDB430-22 |              | 605 bp | 15-Oct-2018 | Isopoda          | Porcellionidae  |                      |                              |
| 268 | MEDB431-22 |              | 561 bp | 12-Apr-2019 | Entomobryomorpha | Entomobryidae   | <i>Lepidocyrtus</i>  |                              |
| 269 | MEDB432-22 |              | 561 bp | 12-Apr-2019 | Entomobryomorpha | Entomobryidae   | <i>Lepidocyrtus</i>  |                              |
