# Supplementary material
Source: MDPI journal article supplement (https://www.mdpi.com/1424-2818/14/3/182)
Supplement: s1 [file s1]

**Supplementary Table S3.** Calculated p-distances between *Octodrilus* MOTU groups. Minimum and maximum values and calculated Standard Deviation and Standard Error are listed.

| MOTU groups | p-distance | %         | Minimum value | Maximum value | Standard Deviation | Standard Error |
|-------------|------------|-----------|---------------|---------------|--------------------|----------------|
| MOTU1/MOTU2 | 0.0668203  | 6.6820277 | 0.059908      | 0.076037      | 0.004283           | 0.000734       |
| MOTU1/MOTU3 | 0.1158851  | 11.588506 | 0.004608      | 0.207373      | 0.098806           | 0.023964       |
| MOTU2/MOTU3 | 0.1927803  | 19.278034 | 0.191244      | 0.193548      | 0.00133            | 0.000768       |
