# Supplementary material
Source: MDPI journal article supplement (https://www.mdpi.com/1424-2818/14/3/182)
Supplement: s1 [file s1]

**Supplementary Table S1.** For each sampling site, a list of geographical coordinates, altitude, and area surface is provided.

| Sampling site location          | Abbreviation | Sampling site type | Latitude | Longitude | Elevation (m) | Area surface (ha) |
|---------------------------------|--------------|--------------------|----------|-----------|---------------|-------------------|
| Poličnik, Zadar County, Croatia | C            | Natural habitat    | 44.18089 | 15.35867  | 95            | /                 |
| Poličnik, Zadar County, Croatia | OE           | Olive orchard      | 44.17758 | 15.35378  | 81            | 24                |
| Škabrnja, Zadar County, Croatia | OI           | Olive orchard      | 44.09511 | 15.44167  | 104           | 0.85              |
| Nadin, Zadar County, Croatia    | VE           | Vineyard           | 44.05021 | 15.48662  | 70            | 15                |
| Baštica, Zadar County, Croatia  | VI           | Vineyard           | 44.15728 | 15.43429  | 105           | 6                 |
